# Supplementary material for: Inorganic/organic composite fluorinated interphase layers for stabilizing ether-based electrolyte in high-voltage lithium metal batteries
Source: Royal Society of Chemistry journal article supplement (doi:10.1039/d3ta05506j), 2023-11-20
Supplement: d3ta05506j1.pdf [file d3ta05506j1.pdf]

**Inorganic/organic composite fluorinated interphase layers for stabilizing ether-based electrolyte in high-voltage lithium metal battery**

Qimeng Ren<sup>a</sup>, Qinglei Wang<sup>b\*</sup>, Li Su<sup>b</sup>, Guodong Liu<sup>b</sup>, Yan Song<sup>b</sup>, Xuehui Shangguan<sup>b\*</sup>,  
Faqiang Li<sup>b\*</sup>

a. School of Chemistry & Chemical Engineering, Linyi University, Linyi 276005, China

b. School of Materials Science and Engineering, Linyi University, Linyi 276003, China

\*Corresponding author.

Corresponding author E-mail: shangguanxuehui@lyu.edu.cn (Xuehui Shangguan);

wangqinglei@lyu.edu.cn (Qinglei Wang); lifaqiang@lyu.edu.cn (Faqiang Li)

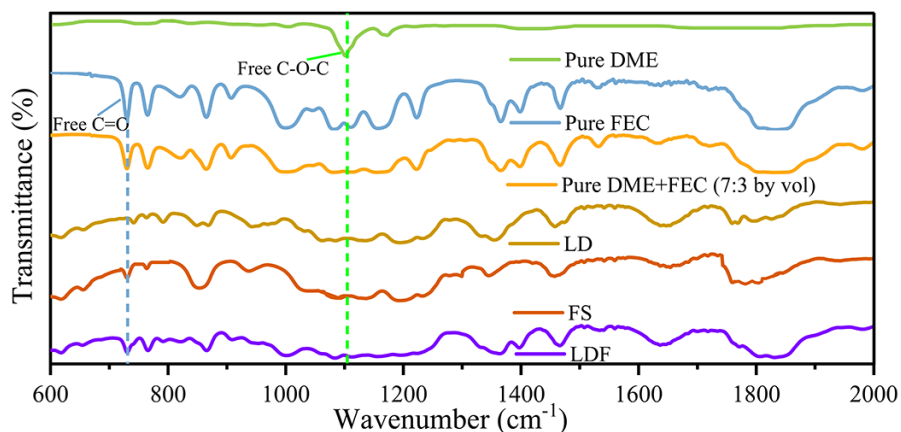

**Fig. S1** FTIR spectra of different solvents and electrolytes.

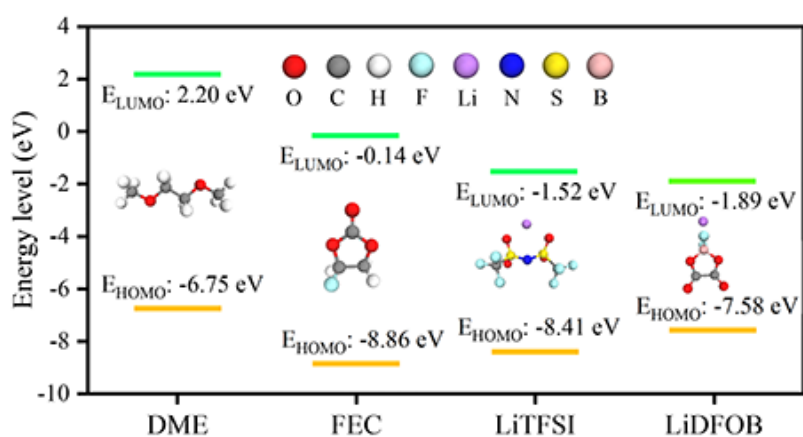

**Fig. S2** Calculated HOMO and LUMO of the solvents and Li salts.

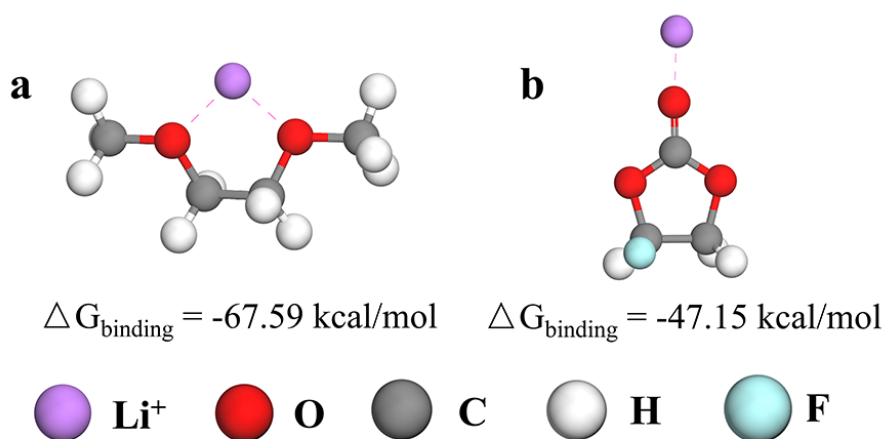

**Fig. S3** The binding energy of (a)  $\text{Li}^+$ -DME and (b)  $\text{Li}^+$ -FEC.

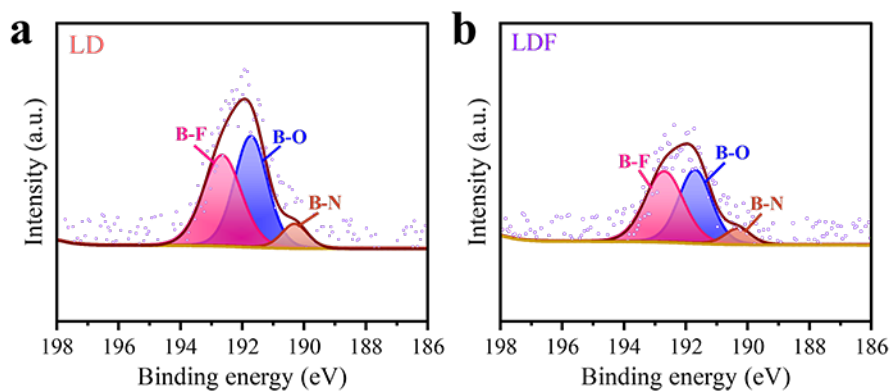

**Fig. S4** B 1s XPS profiles of the LiCoO<sub>2</sub> cathode in Li/LiCoO<sub>2</sub> cells with the (a) LD and (b) LDF electrolytes after 100 cycles.

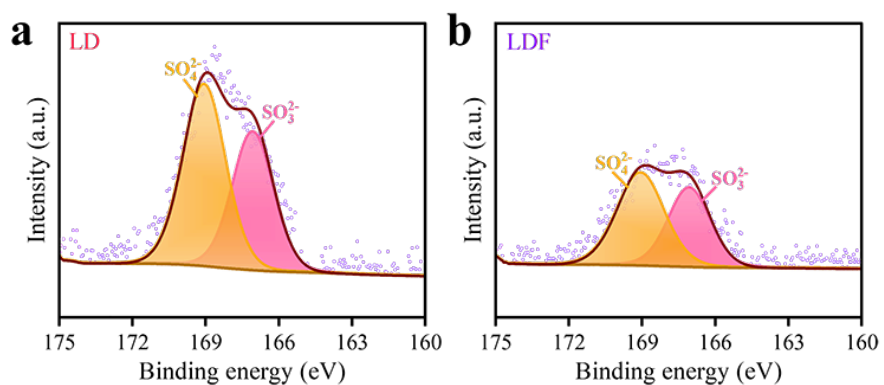

**Fig. S5** S 2p XPS profiles of the LiCoO<sub>2</sub> cathode in Li/LiCoO<sub>2</sub> cells with the (a) LD and (b) LDF electrolytes after 100 cycles.

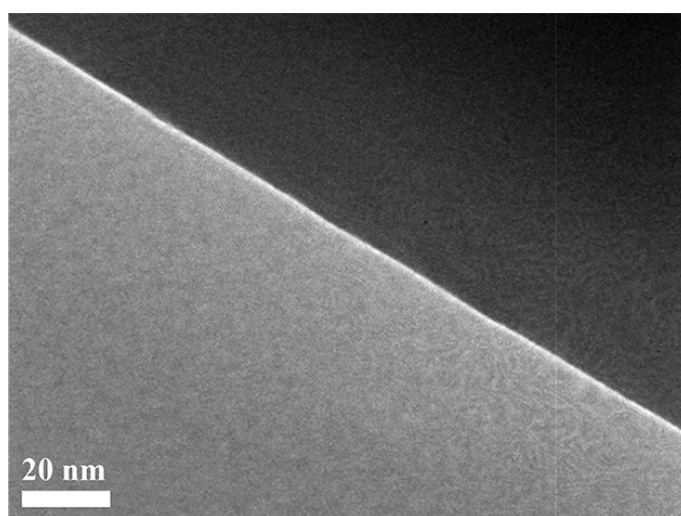

**Fig. S6** TEM morphologies of pristine LiCoO<sub>2</sub> cathode

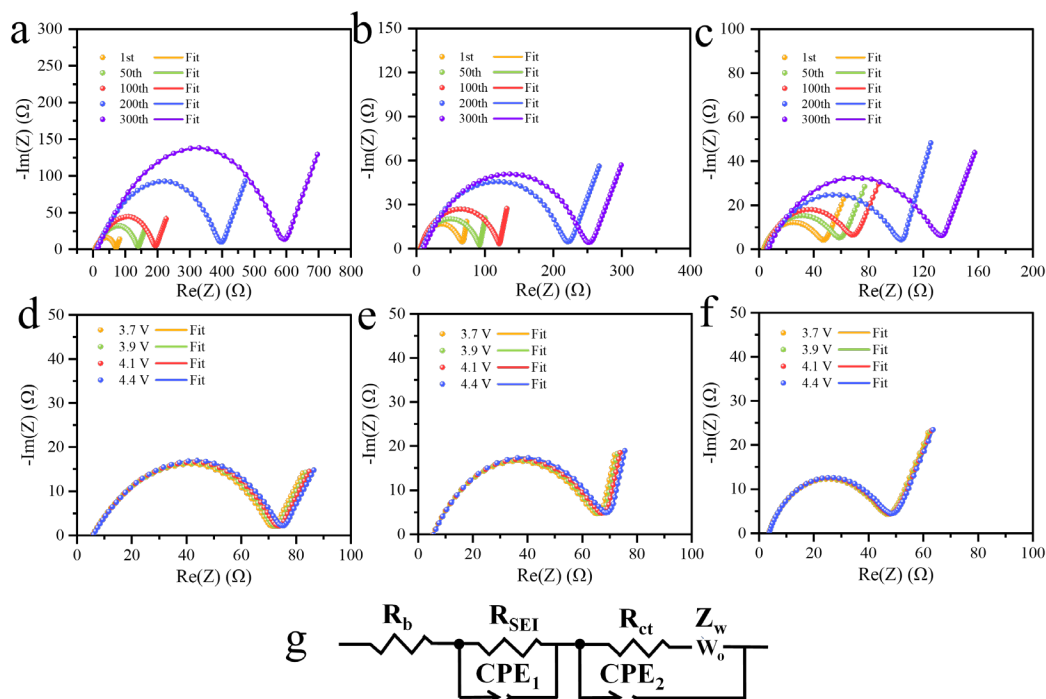

**Fig. S7** (a-c) Electrochemical impedance spectra (EIS) of the Li/LCO cells after different cycles. All data were collected at fully discharged state of the cells. (d-f) Impedance changes during charging process. (a,d) E-control-1, (b,e) LD and (c,f) LDF electrolyte. (g) The corresponding equivalent circuit.

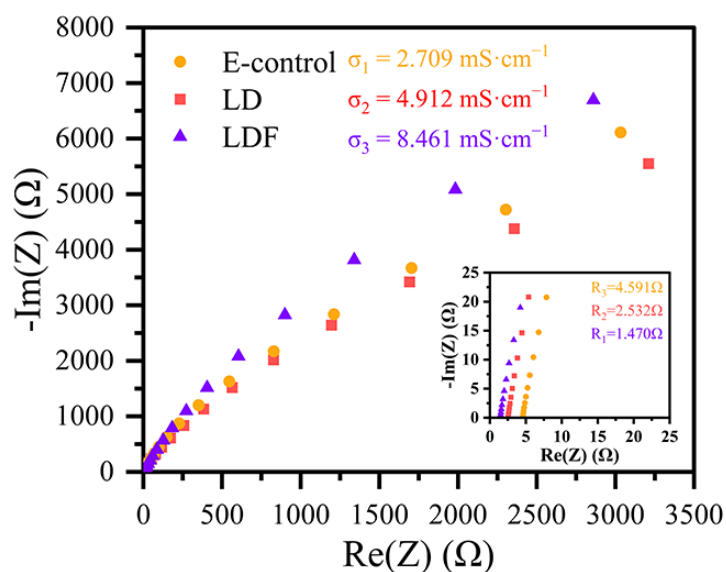

**Fig. S8** Ionic conductivity for E-control, LD, and LDF electrolytes.

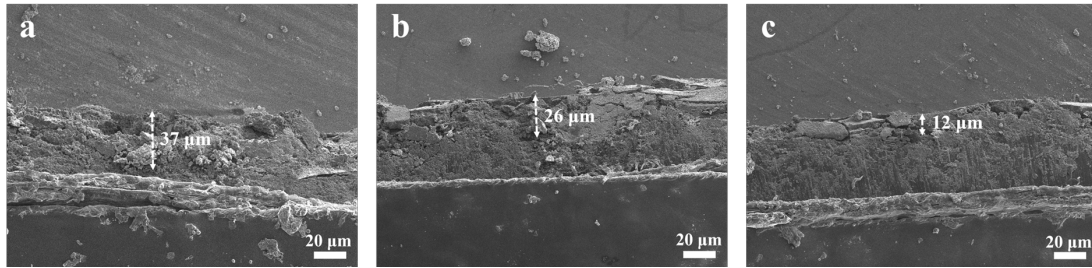

**Fig. S9** Cross-sections SEM images of the Li metal anode in Li/LCO cells with (a) E-control-1, (b) LD and (c) LDF electrolytes after 100 cycles.

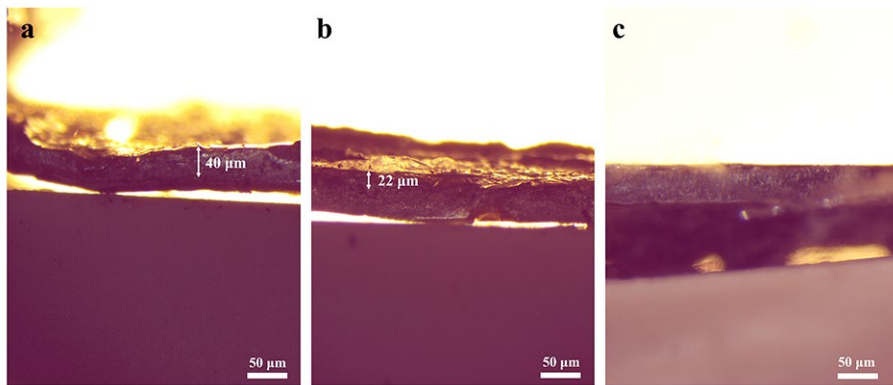

**Fig. S10** Optical microscopy images of the Li metal anode in Li/LCO cells with (a) E-control-1, (b) LD and (c) LDF electrolytes after 100 cycles.

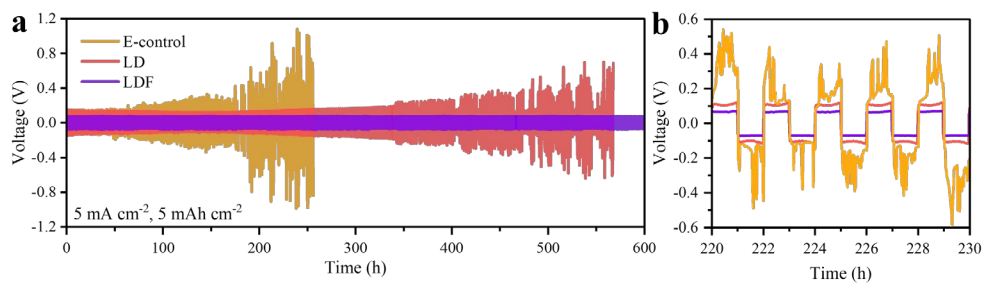

**Fig. S11** (a) Cycling performance of Li/Li symmetric cell in different electrolytes with a capacity of 5 mAh cm<sup>-2</sup> at a current density of 5 mA cm<sup>-2</sup>. (b) Enlarged galvanostatic charge-discharge curves based on a.

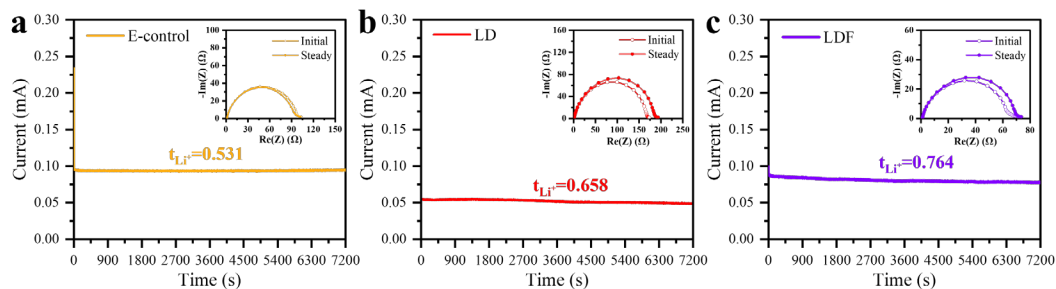

**Fig. S12**  $\text{Li}^+$  transference numbers and the chronoamperometry profiles of Li/Li symmetrical cells in (a) E-control (b) LD (c) LDF electrolytes.

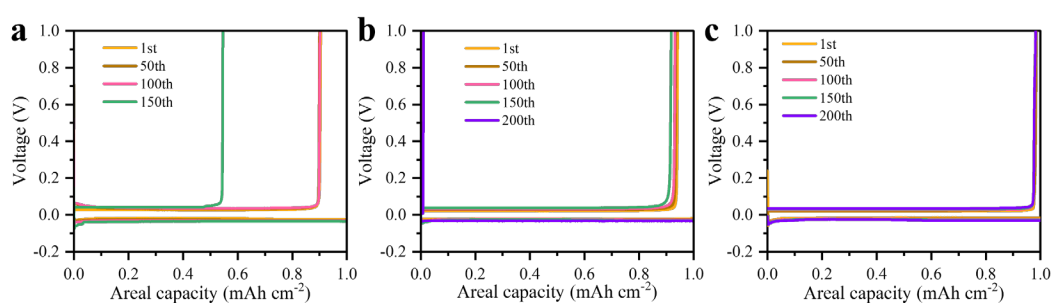

**Fig. S13** Voltage profiles of Li/Cu plating/stripping processes at specific cycles in different electrolytes. (a) E-control, (b) LD, (c) LDF.

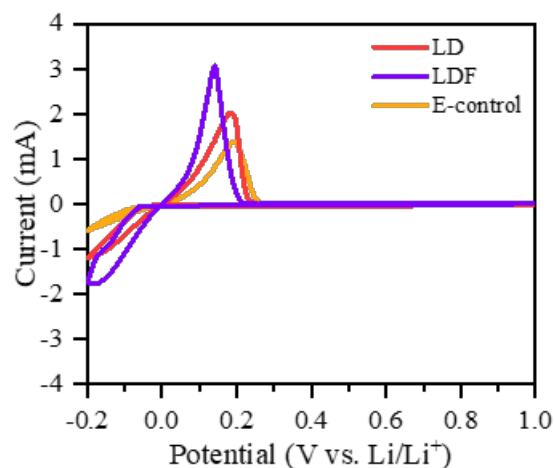

**Fig. S14** CV curves of Li/Cu cells for different electrolytes.

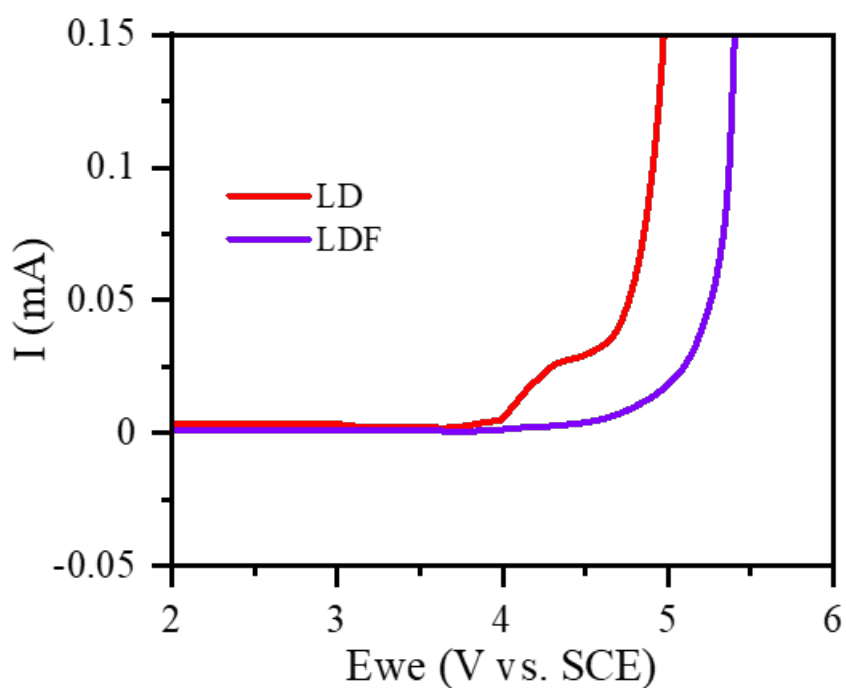

**Fig. S15** Oxidation stability of electrolytes in Li/SS cells tested by linear sweep voltammetry (LSV) at a scan rate of  $1 \text{ mV s}^{-1}$ .

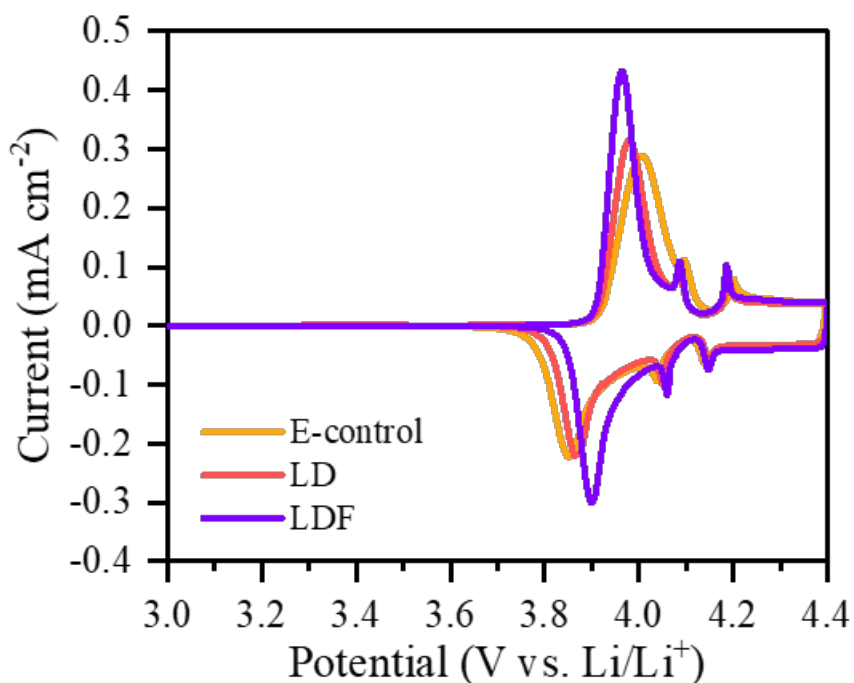

**Fig. S16** CV curves of Li/LiCoO<sub>2</sub> cells for different electrolytes.

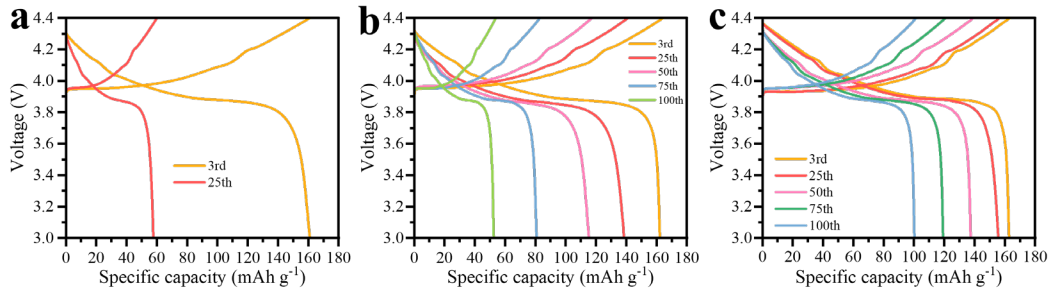

**Fig. S17** Voltage profiles of Cu/ LiCoO<sub>2</sub> cells employing (a) E-control, (b) LD, (c) LDF.

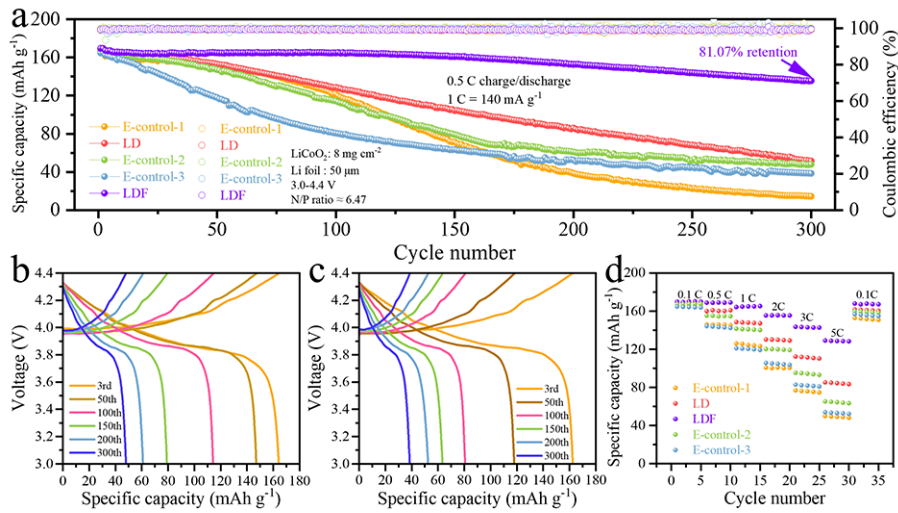

**Fig. S18** (a) Long-term cycling performances of Li/LiCoO<sub>2</sub> cells. (b-c) Corresponding voltage profiles of Li/LiCoO<sub>2</sub> batteries employing different electrolytes. (b) E-control-2; (c) E-control-3. (d) Rate performances.

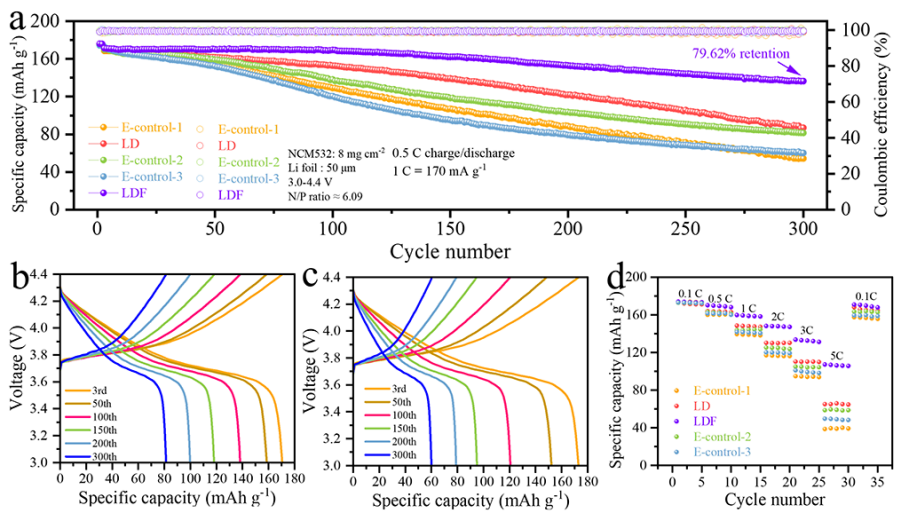

**Fig. S19** (a) Long-term cycling performances of Li/NCM532 cells. (b-c)



Corresponding voltage profiles of Li/NCM532 batteries employing different electrolytes. (b) E-control-2; (c) E-control-3. (d) Rate performances.

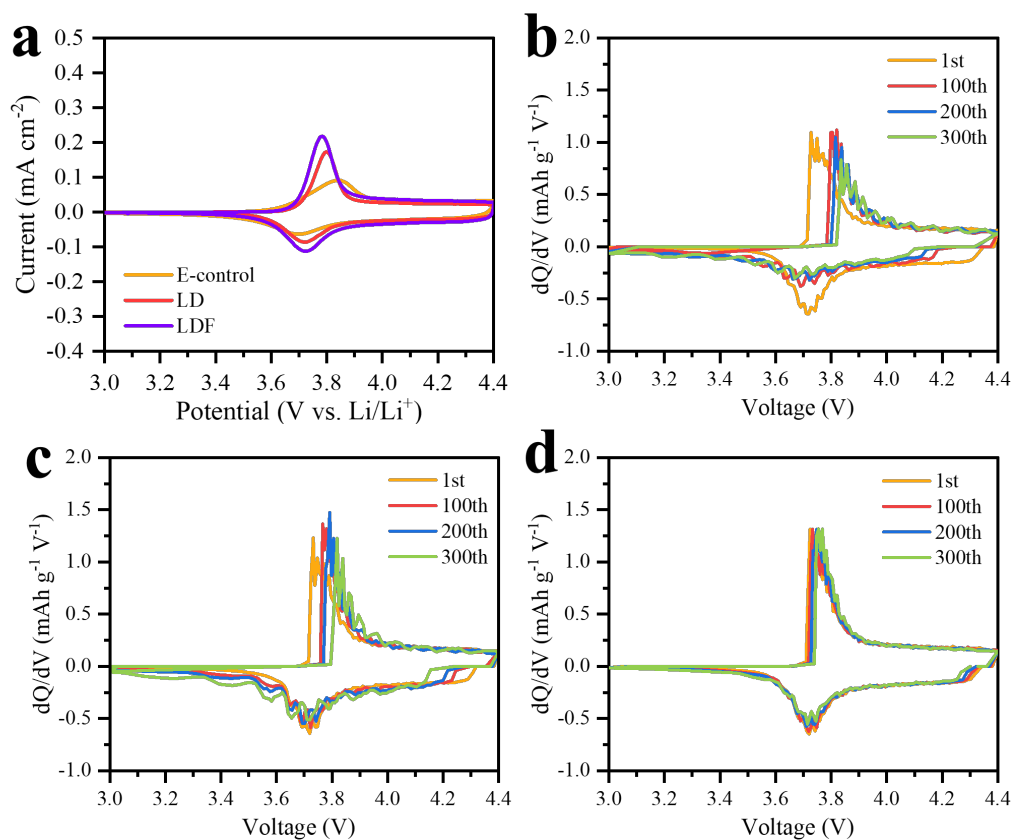

**Fig. S20** (a) Cyclic voltammogram of Li/NCM532 cells in the potential region of 3.0 V–4.4 V at a scan rate of 0.05 mV s<sup>-1</sup> in different electrolytes. (b-d) dQ/dV vs. V profiles of Li/NCM532 cells with different electrolytes at potential range of 3.0-4.4 V. (b) E-control-1, (c) LD and (d) LDF electrolyte.

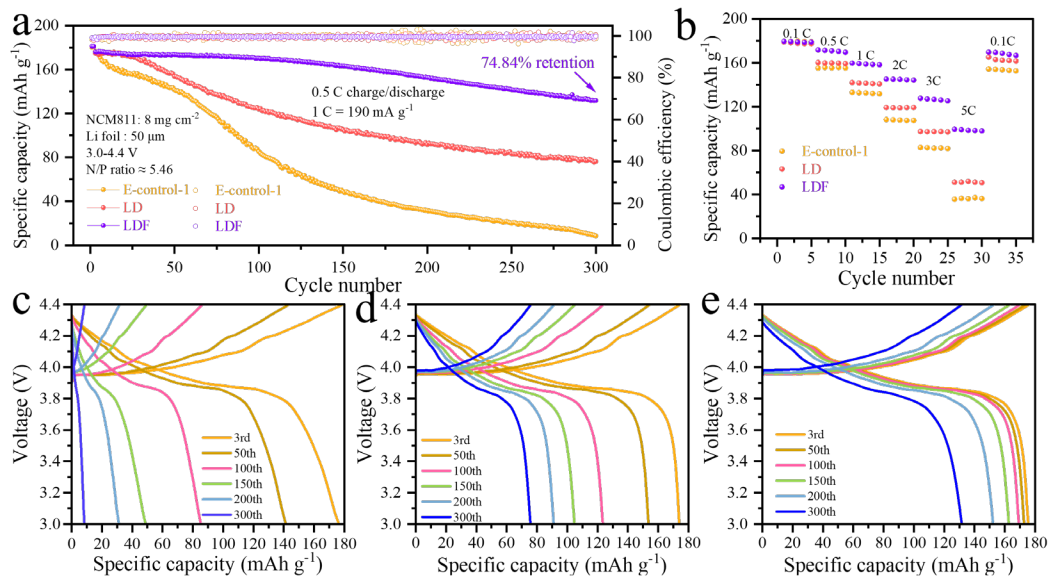

**Fig. S21 (a-e)** Galvanostatic cycling performance of Li/NCM811 cells. (a) Long-term cycling performances of cells. (b) rate performances. Voltage profiles of cells employing (c) E-control-1, (d) LD, (e) LDF.

**Table S1. Corresponding impedance values of Figure S7 a-c.**

| Electrolyte system | E-control       |                   |                  | LD              |                   |                  | LDF             |                   |                  |
|--------------------|-----------------|-------------------|------------------|-----------------|-------------------|------------------|-----------------|-------------------|------------------|
| Cycle number       | Rb ( $\Omega$ ) | Rsei ( $\Omega$ ) | Rct ( $\Omega$ ) | Rb ( $\Omega$ ) | Rsei ( $\Omega$ ) | Rct ( $\Omega$ ) | Rb ( $\Omega$ ) | Rsei ( $\Omega$ ) | Rct ( $\Omega$ ) |
| 1                  | 5.73            | 7.55              | 68.70            | 5.33            | 7.34              | 66.81            | 3.99            | 5.18              | 47.14            |
| 50                 | 8.46            | 15.15             | 137.78           | 6.09            | 10.12             | 92.03            | 4.67            | 6.41              | 58.31            |
| 100                | 10.02           | 21.28             | 193.50           | 6.32            | 13.28             | 120.77           | 5.61            | 7.46              | 67.83            |
| 200                | 13.76           | 43.73             | 397.63           | 10.27           | 24.24             | 220.36           | 7.76            | 11.32             | 102.91           |
| 300                | 16.41           | 65.307            | 593.70           | 11.59           | 27.57             | 250.72           | 9.55            | 14.49             | 131.89           |

**Table. S2** Performance comparison and summary of lithium metal batteries with different conditions and electrolytes in the reported researches.

| Electrolyte composition                                              | Li Anode thickness                 | Cathode                  | Voltage range  | N/P ratio   | Electrochemical performance | Ref |
|----------------------------------------------------------------------|------------------------------------|--------------------------|----------------|-------------|-----------------------------|-----|
| LiFSI-1.2 DME                                                        | 50 $\mu\text{m}$                   | NCM811                   | 2.8~4.4 V      | 2.2         | 80%<br>65 cycles            | 1   |
| LiFSI-1.2DME+3TTE                                                    | 50 $\mu\text{m}$                   | NCM811                   | 2.8~4.4 V      | 2.38        | 80%<br>155 cycles           | 2   |
| 4.6 M LiFSI - 2.3 M LiTFSI-DME                                       | 150 $\mu\text{m}$                  | NCM622                   | 4.4 V          | 21          | 88%<br>300 cycles           | 3   |
| 1.5 M LiFSI-8TTD-2DME                                                | 20 $\mu\text{m}$                   | NCM811                   | 2.8~4.7 V      | 2.5         | 80%<br>100 cycles           | 4   |
| 1 M LiPF <sub>6</sub> + 0.65 M LiNO <sub>3</sub> -FEC/DME            | 45 $\mu\text{m}$                   | NCM811                   | 2.8~4.3 V      | 4.16        | 80%<br>280 cycles           | 5   |
| 2.0 M LiFSI+1 M LiTFSI in DME+1 wt.% LiDFBP+3 wt.% LiNO <sub>3</sub> | 100 $\mu\text{m}$                  | NCM811                   | 3.0~4.2 V      | 7.5         | 80%<br>241 cycles           | 6   |
| 1.2 M LiFSI+0.15 M LiDFOB in EC/EMC/BTFE                             | 50 $\mu\text{m}$                   | NCM333                   | 2.7~4.3 V      | 2.3         | 84%<br>100 cycles           | 7   |
| <b>This work</b>                                                     | <b>50 <math>\mu\text{m}</math></b> | <b>LiCoO<sub>2</sub></b> | <b>3~4.4 V</b> | <b>6.47</b> | <b>81%<br/>300 cycles</b>   |     |

## Reference

1. X. Cao, L. F. Zou, B. E. Matthews, L. C. Zhang, X. Z. He, X. D. Ren, M. H. Engelhard, S. D. Burton, P. Z. El-Khoury, H.-S. Lim, C. J. Niu, H. K. Lee, C. S. Wang, B. W. Arey, C. M. Wang, J. Xiao, J. Liu, W. Xu and J. G. Zhang, *Energy Storage Mater.*, 2021, **34**, 76-84.
2. X. D. Ren, L. F. Zou, X. Cao, M. H. Engelhard, W. Liu, S. D. Burton, H. Lee, C. J. Niu, B. E. Matthews, Z. H. Zhu, C. M. Wang, B. W. Arey, J. Xiao, J. Liu, J. G. Zhang and W. Xu, *Joule*, 2019, **3**, 1662-1676.
3. J. Alvarado, M. A. Schroeder, T. P. Pollard, X. Wang, J. Z. Lee, M. Zhang, T. Wynn, M. Ding, O. Borodin, Y. S. Meng and K. Xu, *Energy Environ. Sci.*, 2019, **12**, 780-794.

4. Y. Zhao, T. H. Zhou, M. El Kazzi and A. Coskun, *ACS Appl. Energy Mater.*, 2022, **5**, 7784-7790.
5. X. Wang, S. Wang, H. Wang, W. Tu, Y. Zhao, S. Li, Q. Liu, J. Wu, Y. Fu, C. Han, F. Kang and B. Li, *Adv Mater*, 2021, **33**, 2007945.
6. S. Kim, S. O. Park, M.-Y. Lee, J.-A. Lee, I. Kristanto, T. K. Lee, D. Hwang, J. Kim, T.-U. Wi, H.-W. Lee, S. K. Kwak and N.-S. Choi, *Energy Storage Mater.*, 2022, **45**, 1-13.
7. L. Yu, S. Chen, H. Lee, L. Zhang, M. H. Engelhard, Q. Li, S. Jiao, J. Liu, W. Xu and J.-G. Zhang, *ACS Energy Lett.*, 2018, **3**, 2059-2067.
